# Supplementary material for: Flexible and conductive titanium carbide–carbon nanofibers for the simultaneous determination of ascorbic acid, dopamine and uric acid
Source: Royal Society of Chemistry journal article supplement (doi:10.1039/c8tb00938d), 2018-01-01
Supplement: c8tb00938d1.pdf [file c8tb00938d1.pdf]

**Flexible and conductive titanium carbide–carbon nanofibers for the simultaneous determination of ascorbic acid, dopamine and uric acid**

Qiaohui Guo\*, Tingting Wu, Lijuan Liu, Haoqing Hou, Shuiliang Chen, Li Wang\*

Department of Chemistry and Chemical Engineering, Jiangxi Normal University,  
Nanchang, Jiangxi 330022, China

**\*Corresponding Author:** Qiaohui Guo, Ph.D.

Tel: (+86) 791-8812-0389; Fax: (+86) 791-8812-0536

E-mail address: guoqiaohui@jxnu.edu.cn

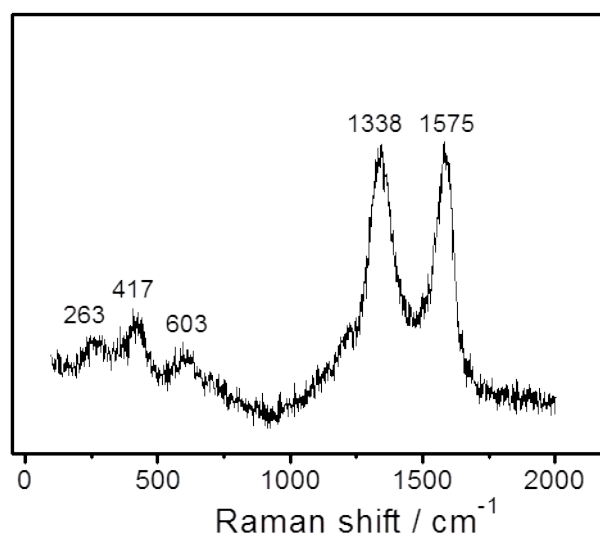

**Fig. S1.** Raman spectrum of TCNFs.

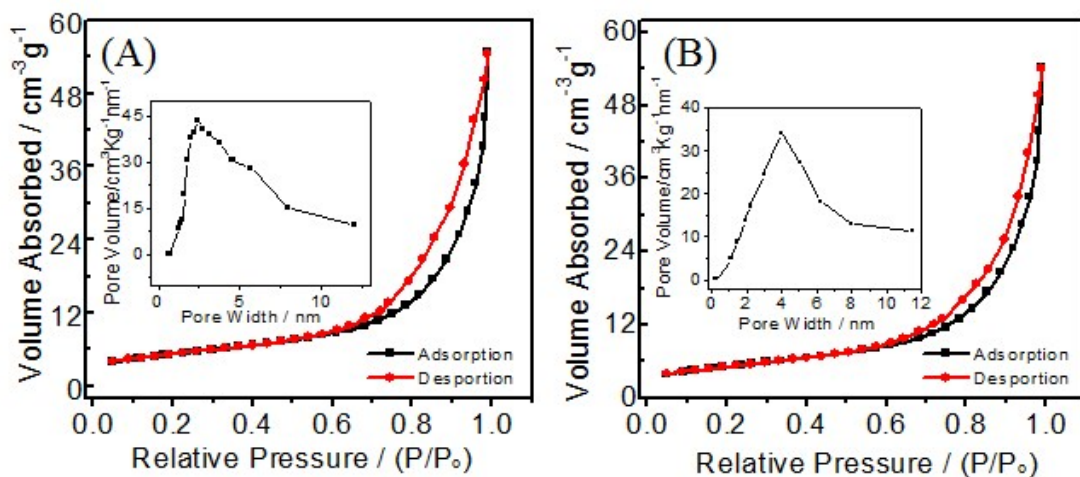

**Fig. S2** Nitrogen adsorption-desorption isotherms of CNFs (A) and TCNFs (B); Inset is the pore size distribution, respectively.

**Table S1** Physicochemical parameters of TCNFs nanohybrids.

| Sample | $S_{BET}$ ( $m^2g^{-1}$ ) | $V_t$ ( $Lg^{-1}$ ) | $S_{mic}$ ( $m^2g^{-1}$ ) | $V_{mic}$ ( $mLg^{-1}$ ) | d (nm) |
|--------|---------------------------|---------------------|---------------------------|--------------------------|--------|
| TCNFs  | 169.2                     | 0.2885              | 57.3                      | 0.0786                   | 3.8    |
| CNFs   | 135.6                     | 0.2352              | 46.5                      | 0.0758                   | 4.2    |

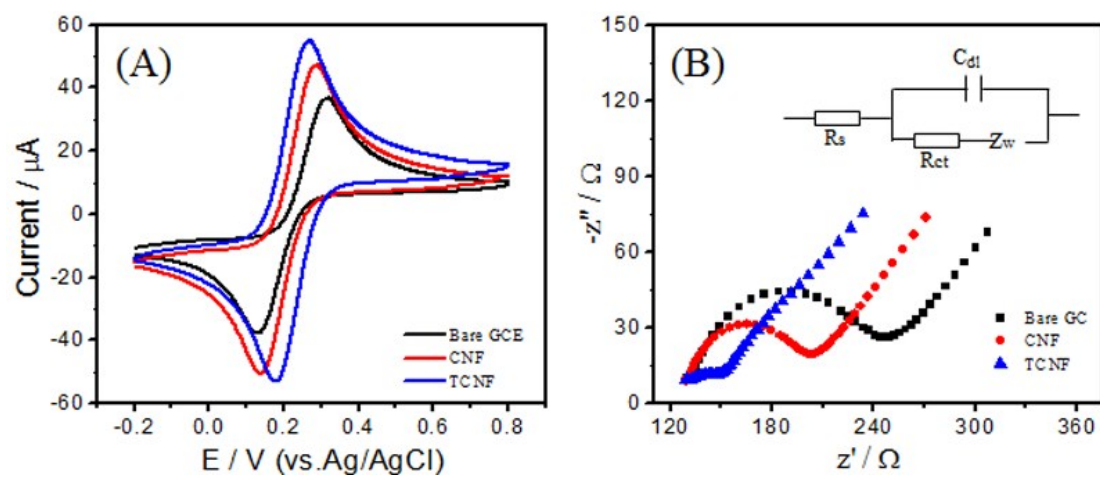

**Fig. S3** CV curves (A) and EIS plots (B) of bare GC, CNFs and TCNFs.

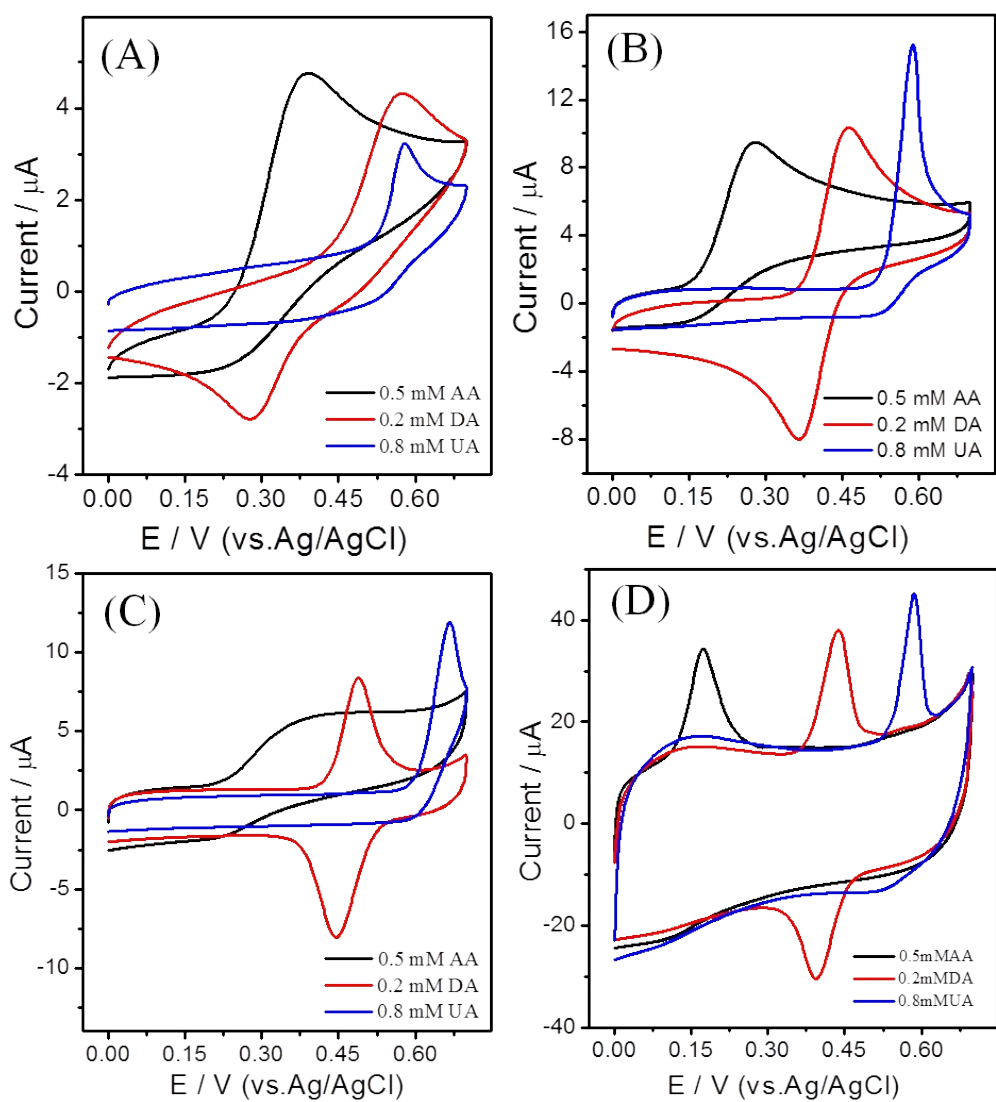

**Fig. S4** CVs of individual determination of three analytes at bare GC (A), CNFs (B), TiC NPs (C) and TCNFs (D) in 0.1 M PBS (pH 3.5) containing of 0.5 mM AA, 0.2 mM DA and 0.8 mM UA at 50 mVs<sup>-1</sup>.

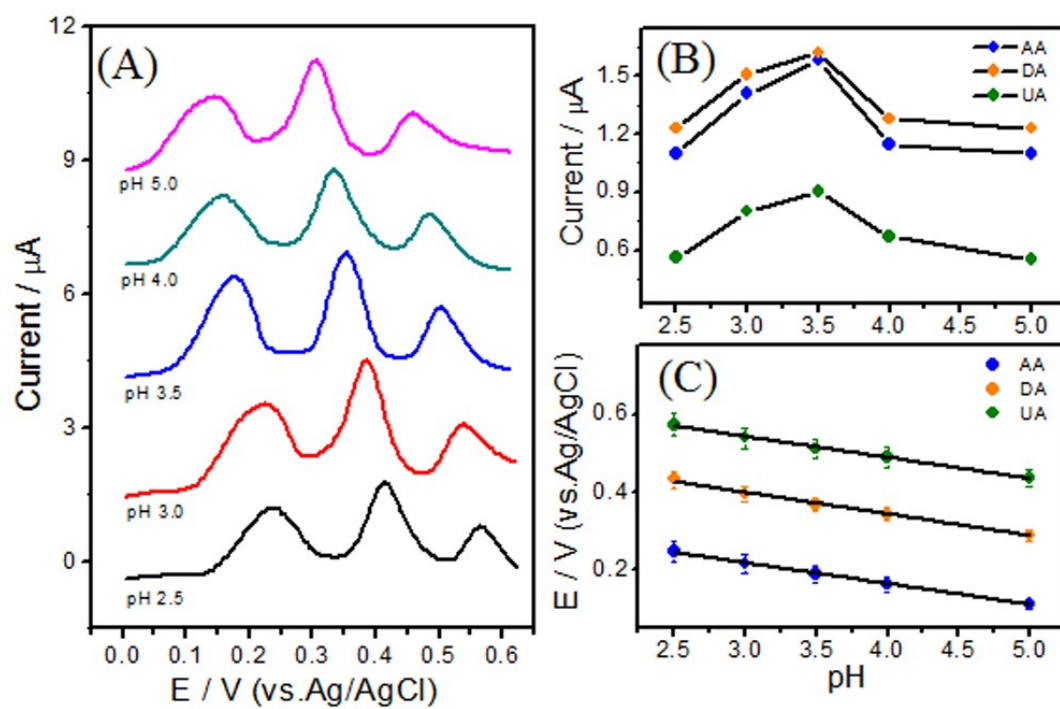

**Fig. S5** (A) DPVs of a mixture of 0.2 mM AA, 0.1 mM DA and 0.15 mM UA at TCNFs in 0.1 M PBS of various pHs. Plots of pH vs peak current (B) and  $E_{pa}$  (C) of AA, DA and UA.

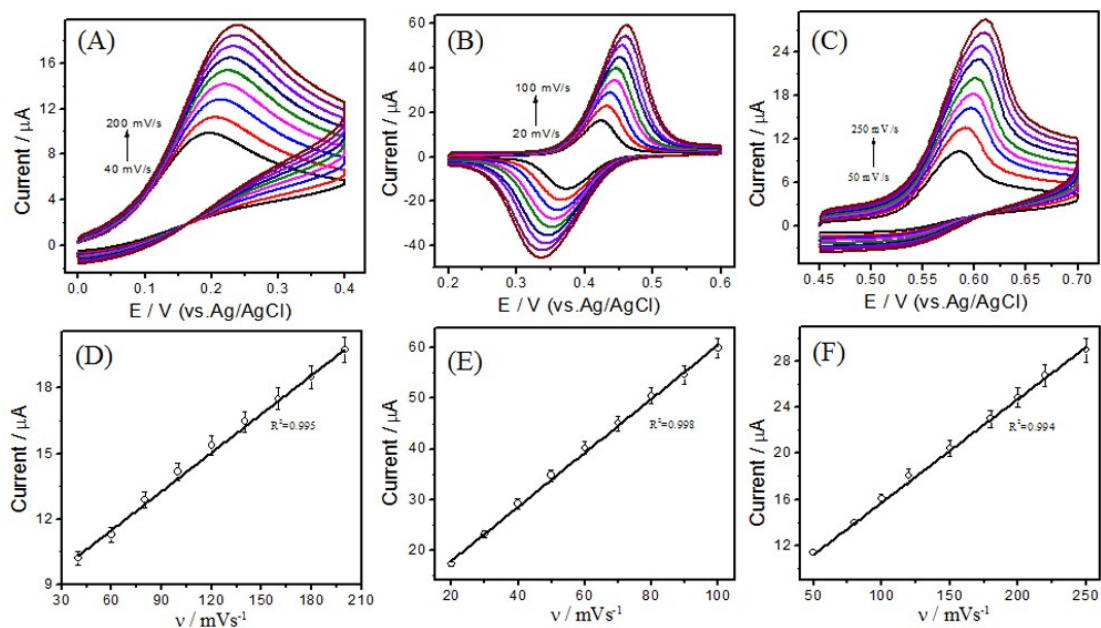

**Fig. S6** Cyclic voltammograms of TCNFs in 0.1 M PBS (pH 3.5) containing 1.0 mM AA (A), 0.2 mM DA (B) and 0.5 mM UA (C) at various scan rates. Plots of anodic peak currents ( $i_{pa}$ ) of AA (D), DA (E) and UA (F) vs scan rate.

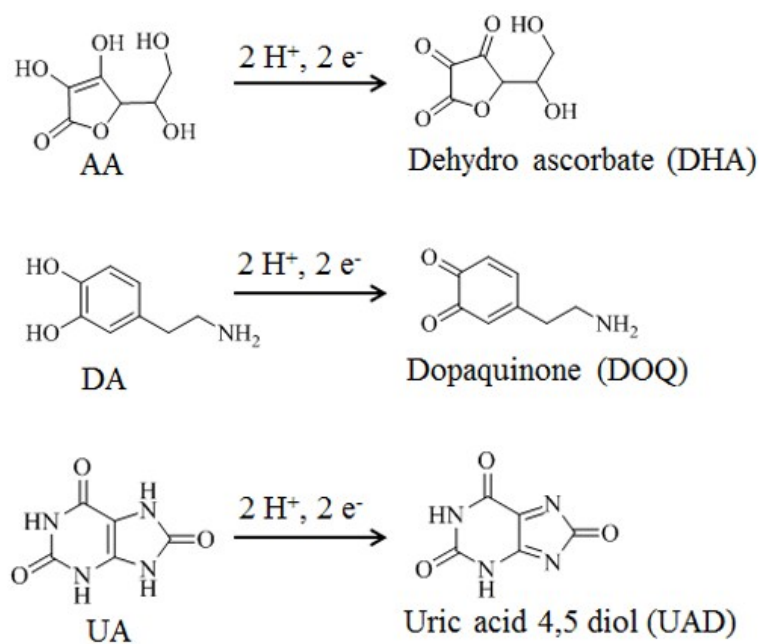

**Scheme S1.** A scheme to illustrate the reaction mechanism of AA, DA and UA at TCNFs.



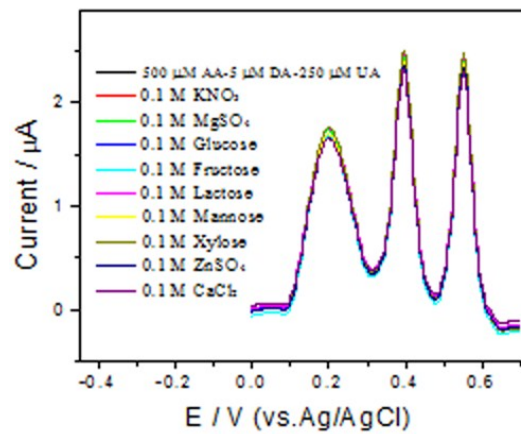

**Fig. S7** DPV responses of TCNFs in 0.1 M PBS (pH 3.5) containing 500  $\mu\text{M}$  AA, 5  $\mu\text{M}$  DA and 250  $\mu\text{M}$  UA with successive addition 0.1 M of  $\text{KNO}_3$ ,  $\text{MgSO}_4$ ,  $\text{ZnSO}_4$ ,  $\text{CaCl}_2$ , glucose, lactose, sucrose, fructose and mannose.

**Table S2** Performances of different electrodes for simultaneous detection of AA, DA and UA.

| Electrodes            | Peak separation (mV) |              |            | Linear range ( $\mu\text{M}$ ) |          |          | Detection limit ( $\mu\text{M}$ ) |      |      | Ref.      |
|-----------------------|----------------------|--------------|------------|--------------------------------|----------|----------|-----------------------------------|------|------|-----------|
|                       | $\Delta E_1$         | $\Delta E_2$ | $\Delta E$ | AA                             | DA       | UA       | AA                                | DA   | UA   |           |
| GO/MWNT               | 240                  | 70           | 310        | 5-300                          | 5-500    | 3-60     | 1.0                               | 1.5  | 1.0  | [1]       |
| Pt NS/C <sub>60</sub> | 176                  | 132          | 308        | 10-1800                        | 0.5-212  | 9.5-1187 | 0.43                              | 0.07 | 0.63 | [2]       |
| PdPt/rGO              | 184                  | 116          | 300        | 40-1200                        | 4-200    | 4-400    | 0.61                              | 0.04 | 0.1  | [3]       |
| PdAg/Rgo              | 204                  | 128          | 332        | 1-4100                         | 50-112   | 3-186    | 0.19                              | 0.02 | 0.65 | [4]       |
| HNP-PtTi              | 200                  | 140          | 340        | 20-1000                        | 4-500    | 10-1000  | 24.0                              | 3.2  | 5.3  | [5]       |
| NiCu/C                | 150                  | 130          | 280        | 20-2500                        | 0.25-40  | 0.5-110  | 5.0                               | 0.01 | 0.1  | [6]       |
| GEF/CFE               | 210                  | 100          | 310        | 74-2305                        | 1.4-126  | 4-371    | 73                                | 1.4  | 4.0  | [7]       |
| e-FGP                 | -                    | -            | -          | 20-400                         | 0.5-35   | 0.5-35   | 2.0                               | 0.02 | 0.01 | [8]       |
| PG                    | 180                  | 130          | 310        | 9-2314                         | 5-710    | 6-130    | 6.45                              | 2.0  | 4.82 | [9]       |
| PM-GR                 | 140                  | 200          | 340        | 75-2275                        | 12-278   | 4-250    | 18                                | 0.63 | 0.59 | [10]      |
| TCNFs                 | 250                  | 170          | 420        | 1-1500                         | 0.05-160 | 1-875    | 0.3                               | 0.02 | 0.3  | This work |

**Table S3** Determination of AA in vitamin C tablets, DA in injection solution and UA in human urine sample using standard addition method.

|                         | Determined ( $\mu\text{M}$ ) | Added ( $\mu\text{M}$ ) | Found ( $\mu\text{M}$ ) | Recovery (%) | RSD (%) |
|-------------------------|------------------------------|-------------------------|-------------------------|--------------|---------|
| AA in vitamin C tablets | 48.56                        | 50.00                   | 98.68                   | 100.12       | 3.2     |
|                         |                              | 100.00                  | 147.88                  | 99.54        | 2.9     |
|                         |                              | 200.00                  | 247.15                  | 99.43        | 3.5     |
| DA injection solution   | 5.10                         | 20.00                   | 24.78                   | 98.73        | 3.1     |
|                         |                              | 50.00                   | 55.25                   | 100.27       | 3.7     |
|                         |                              | 100.00                  | 153.06                  | 98.68        | 2.8     |
| Human urine samples     | 12.10                        | 100.00                  | 110.12                  | 98.21        | 3.4     |
|                         |                              | 200.00                  | 209.05                  | 98.56        | 3.1     |
|                         |                              | 300.00                  | 305.21                  | 97.79        | 3.8     |

## References

- [1] Y.J. Yang and W.K. Li, *Biosens. Bioelectron.*, 2014, **56**, 300–306.
- [2] X. Zhang, L.X. Ma and Y.C. Zhang, *Electrochim. Acta*, 2015, **177**, 118–127.
- [3] J. Yan, S. Liu, Z. Zhang, G. He, P. Zhou, H. Liang, L. Tian, X. Zhou and H. Jiang, *Colloid Surf. B*, 2013, **111**, 392–397.
- [4] L.X. Chen, J.N. Zheng, A.J. Wang, L.J. Wu, J.R. Chen and J.J. Feng, *Analyst*, 2015, **140**, 3183–3192.
- [5] D. Zhao, G. Yu, K. Tian and C. Xu, *Biosens. Bioelectron.*, 2016, **82**, 119–126.
- [6] W.Y. He, Y. Ding, L.F. Ji, X. Zhang and F.C. Yang, *Sens. Actuators B: Chem.*, 2017, **241**, 949–956.
- [7] J. Du, J. Yue, R. Ren, F. Yao, Z. Jiang, F. Yang and P. Y. Du, *Biosens. Bioelectron.*, 2014, **53**, 220–224.
- [8] W.H. Cai, T. Lai, H.J. Du and J.S. Ye, *Sens. Actuators B: Chem.*, 2014, **193**, 492–500.
- [9] S.P. Qi, B. Zhao, H.Q. Tang and X.Q. Jiang, *Electrochim. Acta*, 2015, **161**, 395–402.
- [10] X.F. Liu, L. Zhang, S.P. Wei, S.H. Chen, X. Ou and Q.Y. Lu, *Biosens. Bioelectron.*, 2014, **57**, 232–238.
